# Supplementary material
Source: PubMed Central journal article supplement (PMC9806570)
Supplement: kiac512_supplementary_data.pdf [file kiac512_supplementary_data.pdf]

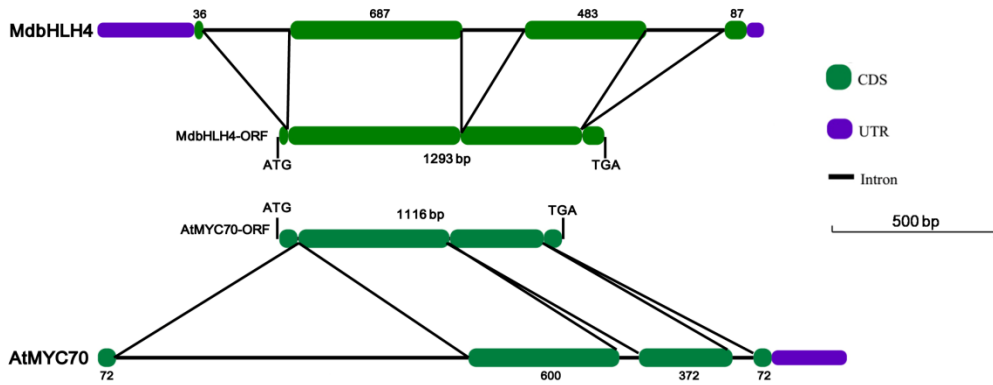

**Supplemental Figure S1.** Schematic diagram of the gene structures of *MdbHLH4* and *AtMYC70*. Numbers indicate the sizes of different exons.

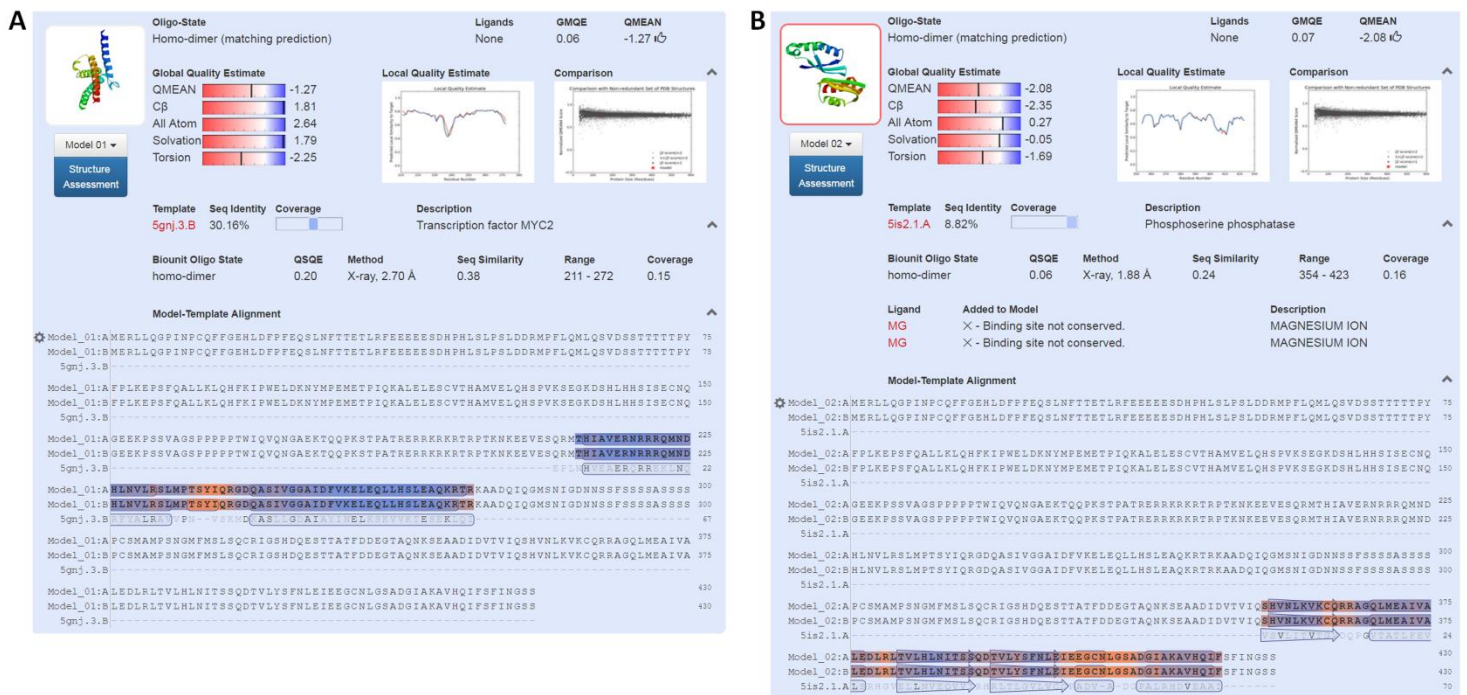

**Supplemental Figure S2.** Details of the 3D structure prediction results of *MdbHLH4* protein. **A**, Protein structure prediction of the bHLH domain of *MdbHLH4* based on the template 5gnj.3.B. **B**, Protein structure prediction of the C-terminal domain of *MdbHLH4* based on the template 5is2.1.A.

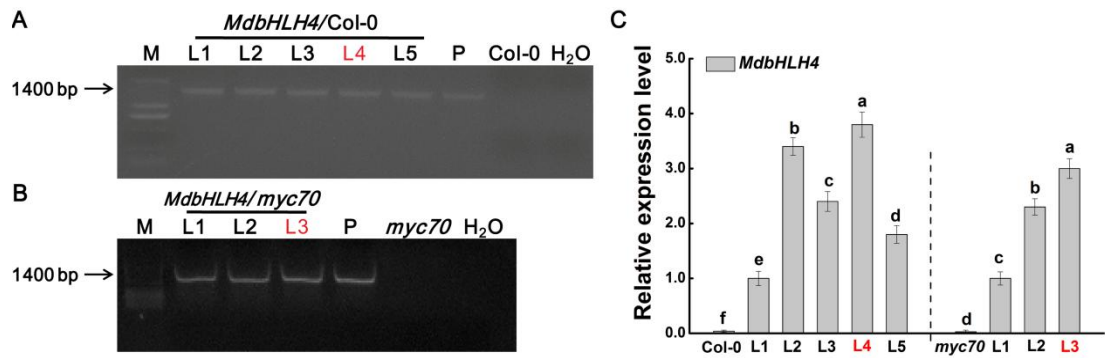

**Supplemental Figure S3.** Identification of *MdbHLH4* transgenic *Arabidopsis* seedlings. **A-B**, Genomic PCR identification of *MdbHLH4* transformation in Col-0 (A) and *myc70* mutant (B) backgrounds. M, DNA marker; H<sub>2</sub>O, negative control; P, positive control (overexpression vector plasmid). **C**, *MdbHLH4* transcripts in different transgenic lines. Error bars indicate the SD of three biological replicates. Different letters represent significant differences through one-way ANOVA and Duncan's tests ( $p < 0.05$ ).

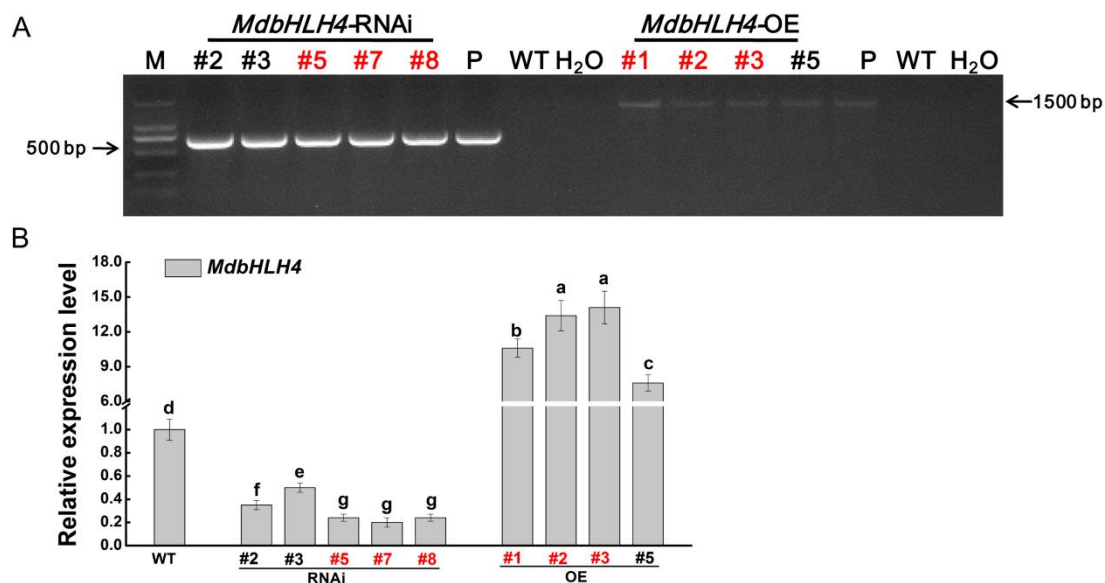

**Supplemental Figure S4.** Identification of *MdbHLH4* transgenic apple plants. **A**, Genomic PCR identification of *MdbHLH4* transgenic apple plants. WT: 'GL-3' plants; P, positive control (plasmid DNA of *MdbHLH4-GFP* and *MdbHLH4-RNAi* vectors). Red numbers indicate the transgenic lines used for cold treatment in this study. **B**, *MdbHLH4* transcripts in WT and transgenic lines. Error bars indicate the SD of three biological replicates. Different letters represent significant differences through one-way ANOVA and Duncan's tests ( $p < 0.05$ ).

**A**

MdCBF1-P1: 5'-AGCCGTA**CAATTGTAAGACAGCTG**TCGCACT-3'  
 MdCBF1-P2: 5'-AAACCACAC**ACTTG**GCACACAC-3'  
 MdCBF1-P2-mut: 5'-AAACCACA**AAAAA**GCACACAC-3'  
 MdCBF1-P3: 5'-ACAG**CAAGT**GAGCAACAAATCGGCGAGGAATATGTCTCCC  
                   CAGAGTGCAG**CAGGTGCGAAAGTACATCTGTTG**-3'  
 MdCBF1-P4: 5'-CTTGCTA**CAAATGTAAGTTTGTTTACAAGT**TTTTTA-3'  
 MdCBF1-P5: 5'-ATTTGTT**CACTTG**GTGTCACTC-3'  
 MdCBF1-P5-mut: 5'-ATTTGTT**AAAAA**GTGTCACTC-3'

MdCBF3-P1: 5'-ATTGTCCAC**ACTTG**CGACTTTTCC-3'  
 MdCBF3-P2: 5'-GTTGCGGTTTTT**CATTG**CCCAGTCGCC-3'  
 MdCBF3-P2-mut: 5'-GTTGCGGTTTTT**AAAAA**CCCAGTCGCC-3'  
 MdCBF3-P3: 5'-AAATCCTACGAC**AGCTG**TAGGGTTTATTGG-3'  
 MdCBF3-P4: 5'-GAATCCACAC**ACTTG**GCACACACAAAC-3'  
 MdCBF3-P4-mut: 5'-GAATCCACA**AAAAA**GCACACACAAAC-3'  
 MdCBF3-P5: 5'-ATATATT**CATGTG**GATTGGGTGATGAG-3'  
 MdCBF3-P5-mut: 5'-ATATATT**AAAAA**GATTGGGTGATGAG-3'

**B**

MdCAX3L-2-P1: 5'-CTTACTCTACTT**CATCTG**ACAAGATACTATCTAGC-3'  
 MdCAX3L-2-P1-mut: 5'-CTTACTCTACTT**AAAAA**ACAAGATACTATCTAGC-3'  
 MdCAX3L-2-P2: 5'-CTATCAACAATCT**CAATTG**CAAAGAAAAATG-3'  
 MdCAX3L-2-P3: 5'-GGTGAGCATTACCAC**ACTTG**AGGGGGTGGATTCCG-3'  
 MdCAX3L-2-P3-mut: 5'-GGTGAGCATTACCAC**AAAAA**AGGGGGTGGATTCCG-3'  
 MdCAX3L-2-P4: 5'-CGTTCAGA**ACTCAGTTG**ACTGATTCTATAGATAAGG-3'  
 MdCAX3L-2-P5: 5'-CTAAACGAGC**CATCTG**GCCAGCCCTCGG-3'

**Supplemental Figure S5.** Sequences of probes used in EMSAs. P1 to P5 indicate the putative binding sites in *MdCBF1/3* (A) and *MdCAX3L-2* (B) promoters. Red letters indicate the E-box elements and the corresponding mutated sequences in the probes.

```

MdCibHLH1_ABS50521_531aa  ....MDDREDRESVSWTRISATATAGNTENKD.....EMGSSISIFKSMLEVELLWYLAANNSIQGHSDVGDISFSPSADPESLILHNEVDSSSCSFSSVFNLLDPM 101
MdICE1_MDF0000662999_541aa MIPRINGVAMDDREDRESVSWTRISATATAGNTENKD.....EMGSSISIFKSMLEVELLWYLAANNSIQGHSDVGDISFSPSADPESLILHNEVDSSSCSFSSVFNLLDPM 111
MdICE1L_MD09G1003800_526aa MIFMSSGPAWGGGIEDLPAASWTRNSSTTHNNSNEAEPFRNQDSSILGASISNEKSMLEGLWYNN...VLSNEAQLDLPSTGASSETTAPICCHDSASCSFSPASLLPSG 112

MdCibHLH1_ABS50521_531aa  .VHYIYPCNPNLSSLNVVPPNPLPHGFDLCLTGFIDTCAAGGSSMMNRGGGATSGFNILSSNSQVNAQNIQSNLQSTTRMFCALENSNSFSGFRVLD..DGSAAALFPNFKILRP 218
MdICE1_MDF0000662999_541aa .VHYIYPCNPNLSSLNVVPPNPLPHGFDLCLTGFIDTCAAGGSSMMNRGGGATSGFNILSSNSQVNAQNIQSNLQSTTRMFCALENSNSFSGFRVLD..DGSAAALFPNFKILRP 228
MdICE1L_MD09G1003800_526aa PFQQFLHFKSCHSSLNVVCSNFFHNSFDLCLTGFILSFGNQFS.....NSSVIMGFTALNSHAQMGTPPLSSADLFASTRILPVTIDANVILDCDFEFGFDGSAQAQLINFAKIL.. 225

MdCibHLH1_ABS50521_531aa  LESFHSVGVQFTLFQRFAALRRNLGDGGGNGLVVSCGGLVNLNGLRKRREMGVCKEKRRMSGGDEVLDLSEDCSGLNYDSDFFEN..TRVDDCAKNGGNSAANSTVIGG.GGCHRG 335
MdICE1_MDF0000662999_541aa LESFHSVGVQFTLFQRFAALRRNLGDGGGNGLVVSCGGLVNLNGLRKRREMGVCKEKRRMSGXDLVDLSEDCSGLNYDSDFFEN..TRVDDCAKNGGNSAANSTVIGG.GGCHRG 345
MdICE1L_MD09G1003800_526aa ...FFEMGAQFTLFQRFR..QNSVGDGGDKLGNIEISE.....FRYGLLESEKRRRNEEGEMEEGSLVSGLNYDSDFFENYSQLVEENAKNGGNSAANSTVIGVEGGRKG 332

MdCibHLH1_ABS50521_531aa  KKKGLFAKNIWAERRRRKLNRLMLRSVVPKISKMDRASILGLAIEYLKELLQRINLHNELESIPPGSALITGTNTFHFLTFTFTLNRKKEELGSSLSFNGCAARVEVRLREG 455
MdICE1_MDF0000662999_541aa KKKGLFAKNIWAERRRRKLNRLMLRSVVPKISKMDRASILGLAIEYLKELLQRINLHNELESIPPGSALITGTNTFHFLTFTFTLNRKKEELGSSLSFNGCAARVEVRLREG 465
MdICE1L_MD09G1003800_526aa KKKGLFAKNIWAERRRRKLNRLMLRSVVPKISKMDRASILGLAIEYLKELLQRINLHNELESIPPGSALITGTNTFHFLTFTFTLNRKKEELGSSLSFNGCAARVEVRLREG 450

MdCibHLH1_ABS50521_531aa  RAVNIHMFCSRRLGLLISIMRLLDNLGILICCAVISCFNGFAMDVFRAEQCEGCDVDFDCIKAVLLDSIGFHEGMM. 531
MdICE1_MDF0000662999_541aa RAVNIHMFCSRRLGLLISIMRLLDNLGILICCAVISCFNGFAMDVFRAEQCEGCDVDFDCIKAVLLDSIGFHEGMM. 541
MdICE1L_MD09G1003800_526aa RAVNIHMFCSRRLGLLISIMRLLDNLGILICCAVISCFNGFAMDVFRAEQCEGCFIEFCIKAVLLDSIGFHEGMM. 526
  
```

**Supplemental Figure S6.** Sequence alignment of MdCibHLH1, MdICE1, and MdICE1L.

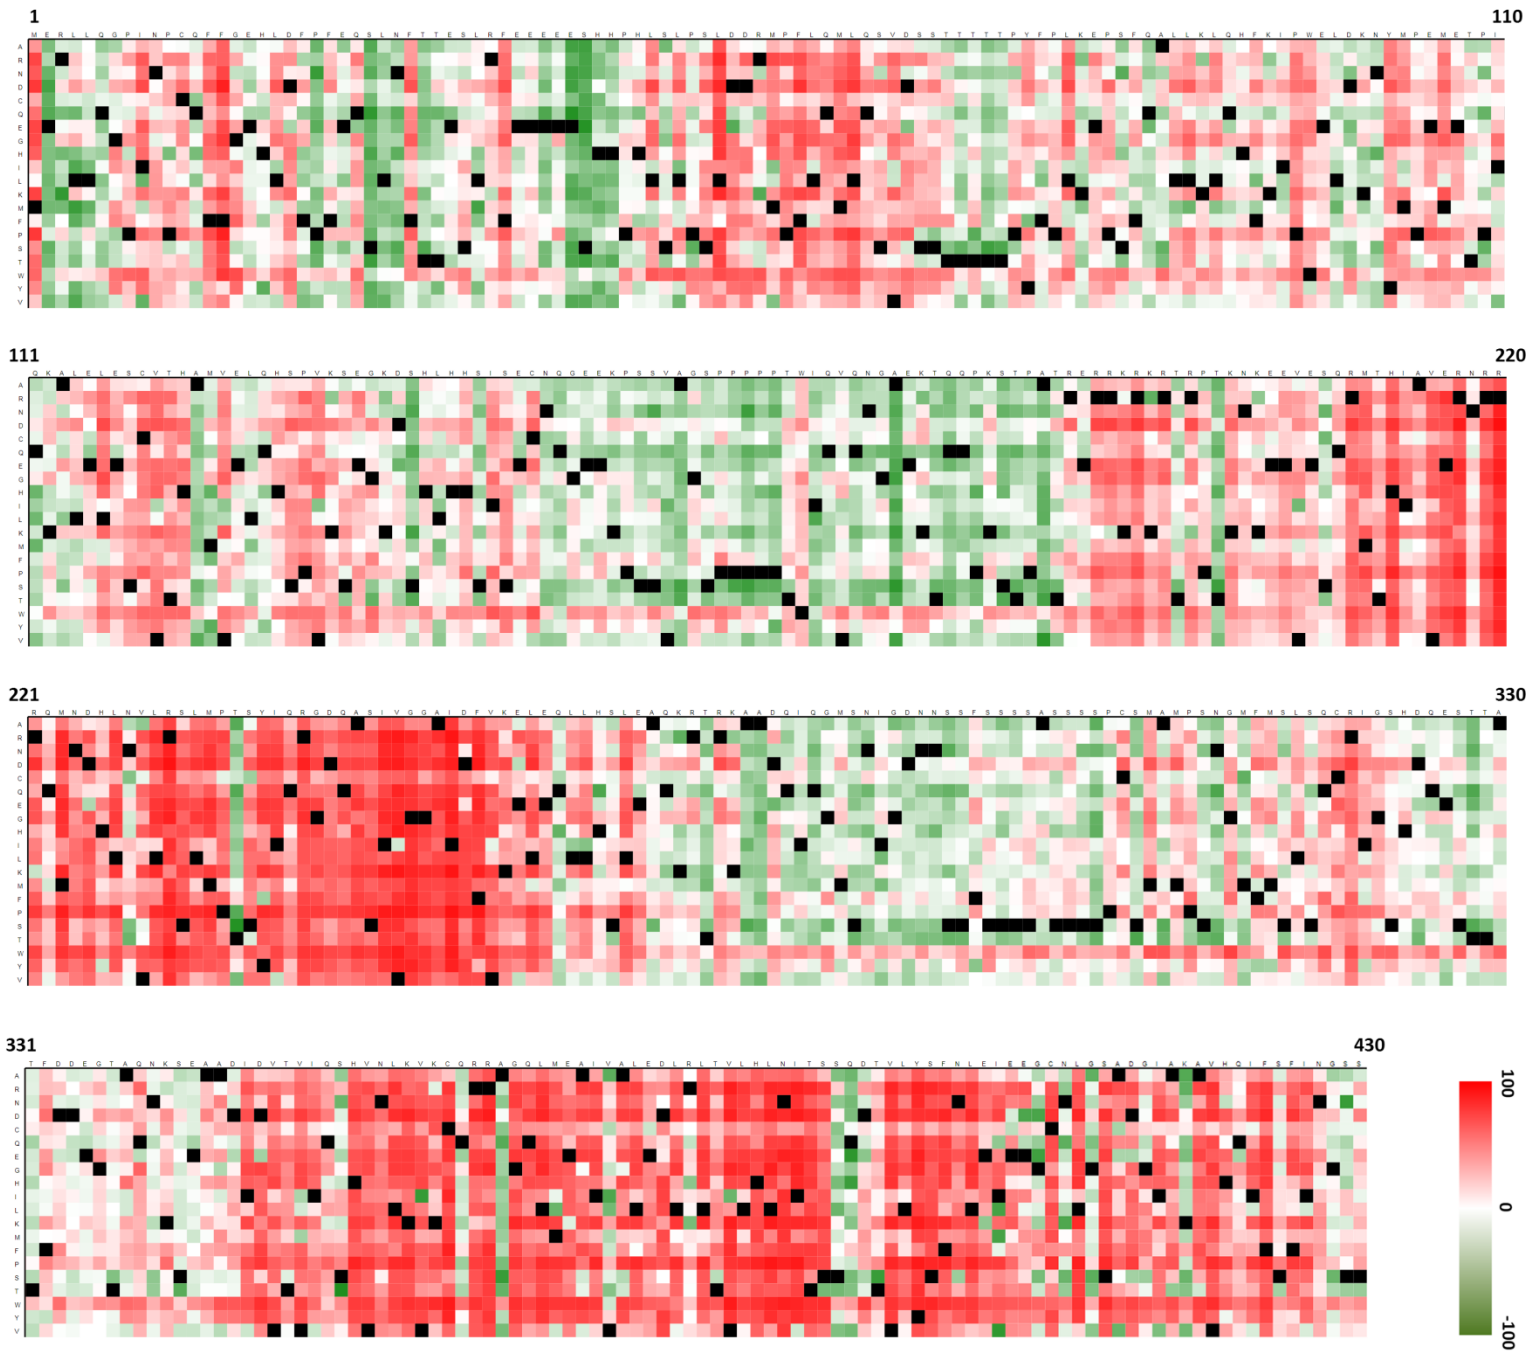

**Supplemental Figure S7.** Prediction of the effects of point mutations on the MdbHLH4 protein. The heat map shows each independent substitution (for the 20 amino acids) for each position of the MdbHLH4 protein. Dark red indicates a high score (score > 50, strong signal for effect), white indicates weak signals ( $-50 < \text{score} < 50$ ), and green indicates a low score (score <  $-50$ , strong signal for neutral/no effect). Black marks correspond to wild-type residues.

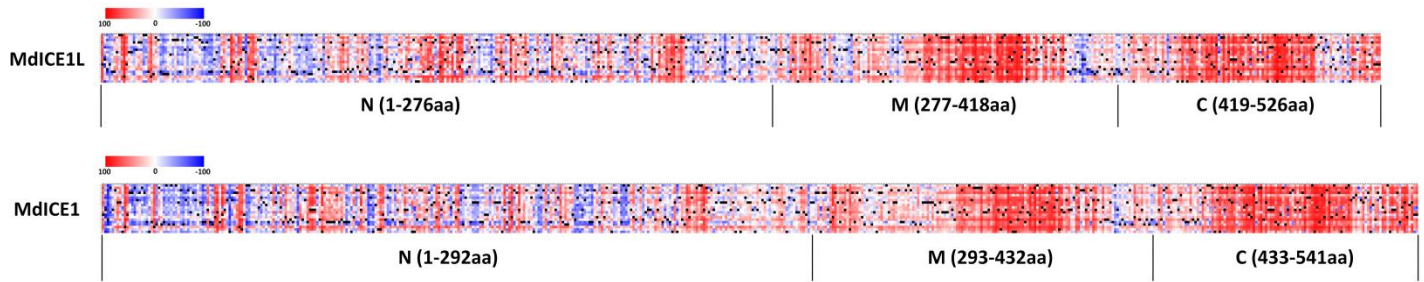

**Supplemental Figure S8.** Prediction of the effects of point mutations and functional region division of MdICE1L and MdICE1 proteins.

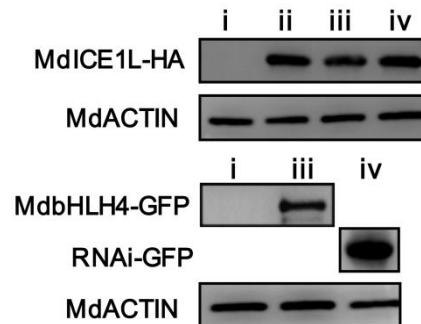

**Supplemental Figure S9.** Identification of MdICE1L-HA and MdbHLH4-GFP protein expression in transgenic calli. The protein levels of MdICE1L-HA and MdbHLH4-GFP were detected with anti-HA and anti-GFP antibodies, respectively. The meanings of Roman numerals are provided in Figure 5E.

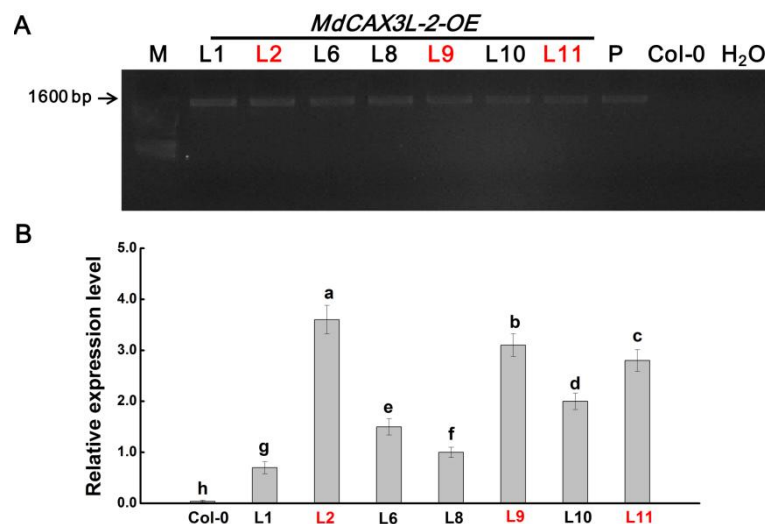

**Supplemental Figure S10.** Identification of *MdCAX3L-2* transgenic *Arabidopsis* seedlings. **A**, Genomic PCR identification of *MdCAX3L-2* transgenic seedlings. P, positive control (plasmid DNA of the *MdCAX3L-2-Flag* vector). **B**, Relative expression analysis of *MdCAX3L-2* in Col and *MdCAX3L-2* transgenic lines. Error bars indicate the SD of three biological replicates. Different letters represent significant differences according to one-way ANOVA and Duncan's test ( $p < 0.05$ ).



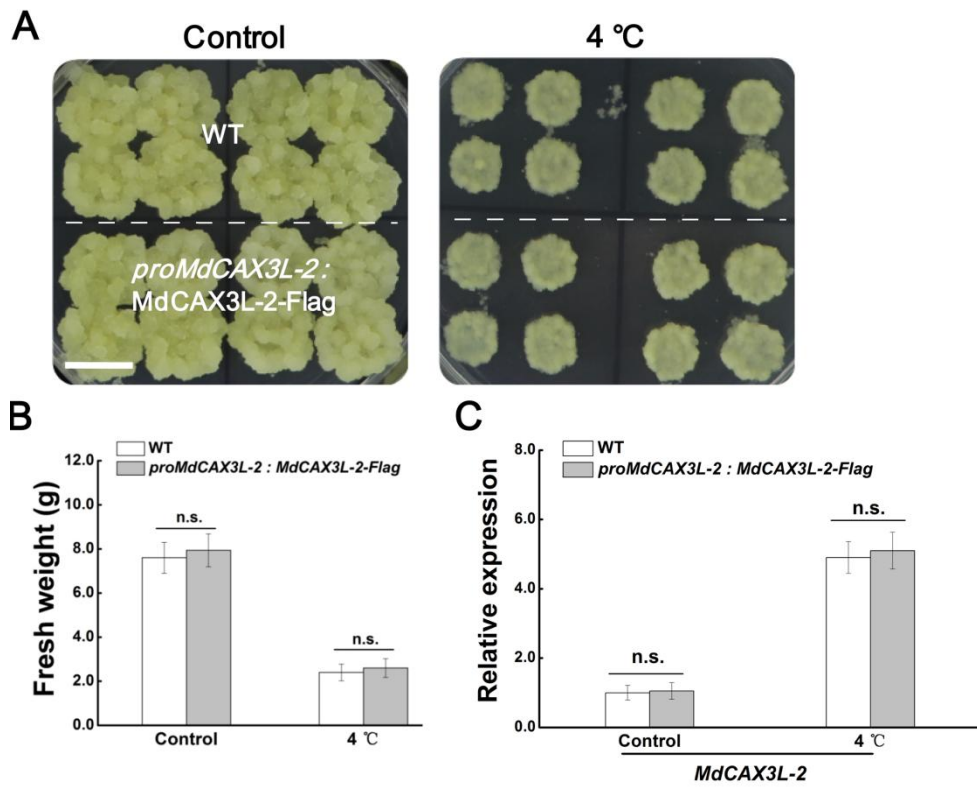

**Supplemental Figure S11.** Comparison of the growth phenotype (A), fresh weight (B), and *MdCAX3L-2* expression (C) between WT and *proMdCAX3L-2::MdCAX3L-2* transgenic apple calli. Scale bars, 1 cm. Error bars indicate the SD of three biological replicates. n.s. means no significant difference relative to the WT according to Student's *t*-test ( $p < 0.05$ ).

**Supplemental TableS1. The primers used in this study.**

| Annotation               | Primer name                                           | Sequence(5'-3')                                   |
|--------------------------|-------------------------------------------------------|---------------------------------------------------|
| Y2H analysis             | MdbHLH4-BT9-F/ MdbHLH4-N-BT9-F/<br>MdbHLH4-N+M-BT9-F  | CGGAATTC <del>CCCGGGGATCCT</del> GGAGAGGCTTCTTCA  |
|                          | MdbHLH4-N55-BT9-F                                     | CGGAATTC <del>CCCGGGGATCCT</del> TGCCATTTCTCCAGAT |
|                          | MdbHLH4-BT9-R/<br>MdbHLH4-C-BT9-R/MdbHLH4-M+C-BT9-R   | GCTTGGCTGCAGGTCGACTCAACTGCTACCATTG                |
|                          | MdbHLH4-N-BT9-R                                       | GCTTGGCTGCAGGTCGACTCAAGCAACTGAGCTGGGT             |
|                          | MdbHLH4-M-BT9-F/MdbHLH4-M+C-BT9-F                     | CGGAATTC <del>CCCGGGGATCCT</del> GGTCTCCACCACCACC |
|                          | MdbHLH4-M-BT9-R/MdbHLH4-N+M-BT9-R                     | GCTTGGCTGCAG GTCGACTCAGTTGTTGTCACCAATA            |
|                          | MdbHLH4-C-BT9-F                                       | CGGAATTC <del>CCCGGGGATCCT</del> GCTCTTTCAGCTCCTC |
|                          | MdICE1L-N163-BT9-F                                    | CGGAATTC <del>CCCGGGGATCCT</del> TGGGTTTCACGGCCCT |
|                          | MdICE1L-N163-BT9-R                                    | GCTTGGCTGCAGGTCGACTTACATCATCATATCA                |
|                          | MdICE2-N158-BT9-F                                     | CGGAATTC <del>CCCGGGGATCCT</del> TGAACAGGGGAGGTGG |
|                          | MdICE2-N158-BT9-R                                     | GCTTGGCTGCAGGTCGACTACATCATGCCATGG                 |
|                          | MdbHLH4-AD424-F/MdbHLH4-N-AD424-F/MdbHLH4-N+M-AD424-F | TCGAATTC <del>CCCGGGGATCCT</del> TGGAGAGGCTTCTTCA |
|                          | MdbHLH4-AD424-R/MdbHLH4-C-AD424-R/MdbHLH4-M+C-AD424-R | AGATCTCTGCAGGTCGACTCAACTGCTACCATTG                |
|                          | MdbHLH4-N-AD424-R                                     | AGATCTCTGCAGGTCGACTCAAGCAACTGAGCTGGGT             |
|                          | MdbHLH4-M-AD424-F/<br>MdbHLH4-M+C-AD424-F             | TCGAATTC <del>CCCGGGGATCCT</del> GGTCTCCACCACCACC |
|                          | MdbHLH4-M-AD424-R/MdbHLH4-N+M-AD424-R                 | AGATCTCTGCAGGTCGACTCAGTTGTTGTCACCAATA             |
|                          | MdICE1L-AD424-F                                       | TCGAATTC <del>CCCGGGGATCCT</del> TGCTTCCGATGTCGAG |
|                          | MdICE1L-AD424-R                                       | AGATCTCTGCAG GTCGACTTACATCATCATATCA               |
|                          | MdICE2-AD424-F                                        | TC GAA TTC CCG G GGATCCTGCTGCCAAGGCTGAA           |
|                          | MdICE2-AD424-R                                        | AGATCTCTGCAG GTCGACTTACATCATGCCATGG               |
|                          | MdbHLH4-N55-BKT7-F                                    | GCCATGGAGGCCGAA TTCATGCCATTTCTCCAGAT              |
|                          | MdbHLH4-N55-BKT7-R                                    | CTGCAGGTCGACGGATCCTCAACTGCTACCATTG                |
|                          | MdICE1L-N163-BKT7-F                                   | GCCATGGAGGCCGAA TTCATGGGTTTCACGGCCCT              |
|                          | MdICE1L-N163-BKT7-R                                   | CTGCAGGTCGACGGATCCTTACATCATCATATCA                |
|                          | AtICE1-ADT7-F                                         | ATGGAGGCCAGTGAATTCATGGGTCTTGACGGAA                |
|                          | AtICE1-ADT7-R                                         | CTCGAGCTCGATGGATCCTCAGATCATACCAGCA                |
|                          | AtICE2-ADT7-F                                         | ATGGAGGCCAGTGAATTCATGAACAGCGAGCGTG                |
|                          | AtICE2-ADT7-R                                         | CTCGAGCTCGATGGATCCTCAAACCAAAACCAGCG               |
|                          | MdMPK3a-ADT7-F                                        | ATGGAGGCCAGTGAATTCATGGCCGACCTCACTCCC              |
|                          | MdMPK3a-ADT7-R                                        | CTCGAGCTCGATGGATCCTTAAAGCATACTCTGGATT             |
|                          | MdMPK3b-ADT7-F                                        | ATGGAGGCCAGTGAATTCATGGCAGACCTCGTTCCC              |
|                          | MdMPK3b-ADT7-R                                        | CTCGAGCTCGATGGATCCTCAAGCATACTCTGGATT              |
|                          | MdMPK6a-ADT7-F                                        | ATGGAGGCCAGTGAATTCATGGAGGGAGGAGGGC                |
| MdMPK6a-ADT7-R           | CTCGAGCTCGATGGATCCTCACTGTAGCTGATAC                    |                                                   |
| MdMPK6b-ADT7-F           | ATGGAGGCCAGTGAATTCATGGAGGGAGGAGGGC                    |                                                   |
| MdMPK6b-ADT7-R           | CTCGAGCTCGATGGATCCTCACTGTCTGCTGGTAC                   |                                                   |
| Y1H analysis             | MdCBF1-pro-pHIS2-F                                    | TCACTATAGGGCGAATTCCTTCCATGCTCGGTC                 |
|                          | MdCBF1-pro-pHIS2-R                                    | TCGCGAACGCGTGAGCTCTAATTTCTGGGACCAG                |
|                          | MdCBF3-pro-pHIS2-F                                    | TCACTATAGGGCGAATTCCTTCCAAAATACTAA                 |
|                          | MdCBF3-pro-pHIS2-R                                    | TCGCGAACGCGTGAGCTCTTCTAGGTACGAGAGT                |
|                          | MdCAX3L-2-pro-pHIS2-F                                 | TCACTATAGGGCGAATTCGGCCCTGTATTGTTCA                |
|                          | MdCAX3L-2-pro-pHIS2-R                                 | TCGCGAACGCGTGAGCTCGATCGATGGTGTATGCA               |
|                          | MdbHLH4-pGADT7-F                                      | ATGGAGGCCAGTGAATTCATGGAGAGGCTTCTTCA               |
|                          | MdbHLH4-pGADT7-R                                      | CTCGAGCTCGATGGATCCTCAACTGCTACCATTG                |
| Dual-luciferase analysis | MdCBF1-pro-0800-F                                     | CTTGATATCGAATTCCTGCAGGTAGATGCTACAATTG             |
|                          | MdCBF1-pro-0800-R                                     | CGCTCTAGAACTAGTGGATCCTAATTTCTGGGACCAG             |
|                          | MdCBF3-pro-0800-F                                     | CTTGATATCGAATTCCTGCAGTACGACTTTCAAGTTT             |
|                          | MdCBF3-pro-0800-R                                     | CGCTCTAGAACTAGTGGATCCTTCTAGGTACGAGAGT             |
|                          | MdCBF1-pro2-0800-F                                    | CTTGATATCGAATTCCTGCAGCGAGACCGCAGTTGACCC           |
|                          | MdCBF1-pro2-0800-R                                    | CGCTCTAGAACTAGTGGATCCTTTTCGGAAGTTGCGGG            |
|                          | MdCBF1-pro5-0800-F                                    | CTTGATATCGAATTCCTGCAGTCCATGCTCGGTCATAC            |
|                          | MdCBF1-pro5-0800-R                                    | CGCTCTAGAACTAGTGGATCCTAAAATATGTTTGTATGTT          |
|                          | MdCBF3-pro2-0800-F                                    | CTTGATATCGAATTCCTGCAGGGCACCCAGTCTGCAATT           |
|                          | MdCBF3-pro2-0800-R                                    | CGCTCTAGAACTAGTGGATCCTATGTTTGTCTAGTTAG            |

|                                          |                                             |                                                     |
|------------------------------------------|---------------------------------------------|-----------------------------------------------------|
|                                          | MdCBF3-pro4-0800-F                          | CTTGATATCGAATTCCTGCAGGAAAGCAACAAGATTCATT            |
|                                          | MdCBF3-pro4-0800-R                          | CGCTCTAGAAGCTAGTGGATCCAGTTGCGGGCGTGGATTG            |
|                                          | MdCBF3-pro5-0800-F                          | CTTGATATCGAATTCCTGCAGGAGTCAAAGTATAAATAC             |
|                                          | MdCBF3-pro5-0800-R                          | CGCTCTAGAAGCTAGTGGATCCGTCAAAGGTCGGCCTCAC            |
|                                          | MdCAX3L-2-pro-0800-F                        | CTTGATATCGAATTCCTGCAGCCCTGTATTGTTTCATTA             |
|                                          | MdCAX3L-2-pro-0800-R                        | CGCTCTAGAAGCTAGTGGATCCGATCGATGGTGATGCAC             |
|                                          | MdbHLH4-62SK-F                              | GGTGGCGGCCGCTCTAGAATGGAGAGGCTTCTTC                  |
|                                          | MdbHLH4-62SK-R                              | CTGCAGCCCCGGGGATCCCTCAACTGCTACCATTG                 |
|                                          | MdICE1L-62SK-F                              | GGTGGCGGCCGCTCTAGAATGCTTCCGATGTCCGAG                |
|                                          | MdICE1L-62SK-R                              | CTGCAGCCCCGGGGATCCCTACATCATGCCATGG                  |
| <b>Split-LUC analysis</b>                | MdbHLH4-cLUC-F                              | AAAGCAGGCTTCGGATCCATGGAGAGGCTTCTTCAA                |
|                                          | MdbHLH4-cLUC-R                              | GTTGTTGATTGAGAATTCCTCAACTGCTACCATTGAT               |
|                                          | MdMPK6a-nLUC-F                              | ATACATATGCCCGTCGACATGGAGGGAGGAGGGCCC                |
|                                          | MdMPK6a-nLUC-R                              | GAAAGCTGGGTTGGTACCCTGTAGCTGATACTCGGG                |
|                                          | MdMPK6b-nLUC-F                              | ATACATATGCCCGTCGACATGGAGGGAGGAGGGCGA                |
|                                          | MdMPK6b-nLUC-R                              | GAAAGCTGGGTTGGTACCCTGTGCTGGTACTCGGG                 |
| <b>Subcellular localization in yeast</b> | MdCAX3L-2-pDR196GFP-F                       | CCCGGGCTGCAGGAATTCATGGCTTCAAACCAAGA                 |
|                                          | MdCAX3L-2-pDR196GFP-R                       | CTTGCTCACCATGTCGACAGCTCCAAGAAGCTGCTCC               |
| <b>Protein purification</b>              | MdbHLH4-pGEX4T-1-F                          | CGTGGATCCCCGGAATTCATGGAGAGGCTTCTTCA                 |
|                                          | MdbHLH4-pGEX4T-1-R                          | ACGATGCGGCCGCTCGAGTCAACTGCTACCATTG                  |
|                                          | MdICE1L-pET28a-F                            | AAATGGGTGCGGGATCCATGCTTCCGATGTCCGAG                 |
|                                          | MdICE1L-pET28a-R                            | GGCCGCAAGCTTGTGCGACCATCATCATATCATGAA                |
| <b>Genetic transformation</b>            | MdICE1L-pCambia-3HA-F                       | GAATTCGAGCTCGGTACCCTTCCGATGTCCGAG                   |
|                                          | MdICE1L-pCambia-3HA-R                       | GGTCTGACTCTAGAGGATCCCTACATCATGCCATGG                |
|                                          | MdbHLH4-pCambia-4MYC-3FLAG-F                | GCCCATAGGCCTGAATTCGGAGAGGCTTCTTCAAGG                |
|                                          | MdbHLH4-pCambia-4MYC-3FLAG-R                | CTGCAGGTCGACTCTAGACAAGTCTACCATTGAT                  |
|                                          | MdCAX3L-2-pCambia-4MYC-3FLAG-F              | GCCCATAGGCCTGAATTCGGCTTCAAACCAAGA                   |
|                                          | MdCAX3L-2-pCambia-4MYC-3FLAG-R              | CTGCAGGTCGACTCTAGATAAGTCCAAGAAGTGC                  |
|                                          | MdCAX3L-2pro-pCambia-4MYC-MdCAX3L-2-3FLAG-F | AGAAGACCAAAGGGCAATAACTTAAACAACATTTAG                |
|                                          | MdCAX3L-2pro-pCambia-4MYC-MdCAX3L-2-3FLAG-R | TGGTTTGAAGCCGAATTCGATCGATGGTGATGCACAC               |
|                                          | MdbHLH4-2300GFP-F                           | CTCGGTACCCGGGGATCCATGGAGAGGCTTCTTCA                 |
|                                          | MdbHLH4-2300GFP-R                           | GCTCACCATGGTGTGCGACACTGCTACCATTGATG                 |
|                                          | MdCAX3L-2-2300GFP-F                         | CTCGGTACCCGGGGATCCATGGCTTCAAACCAAGA                 |
|                                          | MdCAX3L-2-2300GFP-R                         | GCTCACCATGGTGTGCGACAGCTCCAAGAAGTCTC                 |
|                                          | MdCAX3L-2-RNAi-F                            | GGGGACAAGTTTGTACAAAAAAGCAGGCTTCGTGTGCATCA<br>CCATGC |
|                                          | MdCAX3L-2-RNAi-R                            | GGGGACCACTTTGTACAAGAAAGCTGGGTACTGTCTGAGAA<br>GGGC   |
|                                          | MdbHLH4-RNAi-F                              | GGGGACAAGTTTGTACAAAAAAGCAGGCTTCGAGGAGGAA<br>GAAGAAT |
|                                          | MdbHLH4-RNAi-R                              | GGGGACCACTTTGTACAAGAAAGCTGGGTCCATTTCAAGCA<br>TGTA   |
| <b>RT-qPCR</b>                           | MdbHLH4-qF                                  | GTCTCCACCACCACCCTACC                                |
|                                          | MdbHLH4-qR                                  | TCCGCTGGCTCTCCACTTCTTC                              |
|                                          | MdMDH-qF                                    | CGTGATTGGGTACTTGGAAAC                               |
|                                          | MdMDH-qR                                    | TGGCAAGTGACTGGGAATGA                                |
|                                          | MdCBF1-qF                                   | TCTTCCAACGCCAAGGACATTTCAG                           |
|                                          | MdCBF1-qR                                   | CGCCACAGGAGATCCACAAACC                              |
|                                          | MdCBF3-qF                                   | TTGCCTCAACTTTGCCGACTCTG                             |
|                                          | MdCBF3-qR                                   | GAAGCACCACAAGCCTCATCCG                              |
|                                          | MdKIN1-qF                                   | AAGACCAGCACAATGATGGACAAGG                           |
|                                          | MdKIN1-qR                                   | TGTTTCATGCCGGTAGCGTTCTTG                            |
|                                          | MdRD29A-qF                                  | TTGGACCGACCGAGAGGATTGG                              |
|                                          | MdRD29A-qR                                  | TTCTTCACCCGCTGCATGAGTTG                             |
|                                          | MdCOR47-qF                                  | AGGCTATCACAAAGGAGGAGACAC                            |
|                                          | MdCOR47-qR                                  | GTCCGTTGGCTCTTCGTGGTAATG                            |
|                                          | MdCOR15A-qF                                 | TCCTGTCTCTGTCAAACCGCTTTAC                           |
|                                          | MdCOR15A-qR                                 | TCCTCTCCCTCTCGCACTTCAC                              |
|                                          | MdCAX3L-2-qF                                | TTGTCCAGAGCCAGCAGCATTG                              |
|                                          | MdCAX3L-2-qR                                | CAACATCATCGTCCGATTCCTCCTG                           |
|                                          | AtActin-qF                                  | GGAAAGGATCTGTACGGTAAC                               |
|                                          | AtActin-qR                                  | TGTGAACGATTCCCTGGAC                                 |
| AtCBF1-qF                                | TGGAGGAGACGATGGTGGAAGC                      |                                                     |



|                              |                                      |                                                                                   |
|------------------------------|--------------------------------------|-----------------------------------------------------------------------------------|
|                              | AtCBF1-qR                            | CAAAGTCGGCATCCCAAACATTGTC                                                         |
|                              | AtCBF3-qF                            | TCAATTTTCGCTGACTCGGCTTGG                                                          |
|                              | AtCBF3-qR                            | CCGTCGTCGCATCACACATCTC                                                            |
|                              | AtRD29A-qF                           | GGTGC GACTGATGAGGTGAAGC                                                           |
|                              | AtRD29A-qR                           | GTGGAGCCAAGTGATTGTGGAGAC                                                          |
|                              | AtKIN1-qF                            | TCAGAGACCAACAAGAATGCCTTCC                                                         |
|                              | AtKIN1-qR                            | GCCGCATCCGATACACTCTTTCC                                                           |
|                              | AtCOR47-qF                           | GGACACCACGACAAGACAGCAG                                                            |
|                              | AtCOR47-qR                           | TCCACCACACTCTCCGACACTG                                                            |
|                              | AtCOR15A-qF                          | TCAGGAGCTGTTCTCACTGGTATGG                                                         |
|                              | AtCOR15A-qR                          | CGTCACCTTTAGCGGCGTAGATC                                                           |
| <b>EMSA probes</b>           | MdCBF1-P1-F                          | AGCCGTACAATTGTAAGACAGCTGTGCGACT                                                   |
|                              | MdCBF1-P1-R                          | AGTGC GACAGCTGTCTTACAATTGTACGGCT                                                  |
|                              | MdCBF1-P2-F                          | AAACCACACACTTGGCACACAC                                                            |
|                              | MdCBF1-P2-R                          | GTGTGTGCCAAGTGTGTGGTTT                                                            |
|                              | MdCBF1-P3-F                          | ACAGCAAGTGAGCAACAAATCGGCGAGGAATATGTCTCCCC<br>AGAGTGTGTCAGCAGGTGCGAAAGTACATCTGTTGG |
|                              | MdCBF1-P3-R                          | CCAACAGATGTACTTTTCGCACCTGCTGCAGCACTCTGGGGA<br>GACATATTCCTCGCCGATTGTTGCTCACTGTCTGT |
|                              | MdCBF1-P4-F                          | CTTGCTACAAATGTAAGGTTTGTGTTACAAGTGTTTTTTA                                          |
|                              | MdCBF1-P4-R                          | TAAAAACACTTGTAACAAACCTTACATTTGTAGCAAG                                             |
|                              | MdCBF1-P5-F                          | ATTTGTTCACTTGGTGTCACTC                                                            |
|                              | MdCBF1-P5-R                          | GAGTGACACCAAGTGAACAAAT                                                            |
|                              | MdCBF1-P2-mut-F                      | AAACCACAAAAAAGCACACAC                                                             |
|                              | MdCBF1-P2-mut-R                      | GTGTGTGCTTTTTTTGTGGTTT                                                            |
|                              | MdCBF1-P5-mut-F                      | ATTTGTTAAAAAAGTGTCACTC                                                            |
|                              | MdCBF1-P5-mut-R                      | GAGTGACACTTTTTTAACAAAT                                                            |
|                              | MdCBF3-P1-F                          | ATTGTCCACACTTGC GACTTTTCC                                                         |
|                              | MdCBF3-P1-R                          | GGAAAAGTCGCAAGTGTGGACAAT                                                          |
|                              | MdCBF3-P2-F                          | GTTTCGCTTTTTTCATTTGCCAGTCGCC                                                      |
|                              | MdCBF3-P2-R                          | GGCGACTGGGCAAATGAAAAACGCGAAC                                                      |
|                              | MdCBF3-P3-F                          | AAATCCTACGACAGCTGTAGGGTTTATTGG                                                    |
|                              | MdCBF3-P3-R                          | CCAATAAACCCCTACAGCTGTCGTAGGATTT                                                   |
|                              | MdCBF3-P4-F                          | GAATCCACACACTTGGCACACACAAAC                                                       |
|                              | MdCBF3-P4-R                          | GTTTGTGTGTGCCAAGTGTGTGGATTTC                                                      |
|                              | MdCBF3-P5-F                          | ATATATTCATGTGGATTGGGTGATGAG                                                       |
|                              | MdCBF3-P5-R                          | CTCATCACCCAATCCACATGAATATAT                                                       |
|                              | MdCBF3-P2-mut-F                      | GTTTCGCTTTTTTAAAAAACCCAGTCGCC                                                     |
|                              | MdCBF3-P2-mut-R                      | GGCGACTGGGTTTTTTAAAAACGCGAAC                                                      |
|                              | MdCBF3-P4-mut-F                      | GAATCCACAAAAAAGCACACACAAAC                                                        |
|                              | MdCBF3-P4-mut-R                      | GTTTGTGTGTGCTTTTTTTGTGGATTTC                                                      |
|                              | MdCBF3-P5-mut-F                      | ATATATTAAAAAAGATTGGGTGATGAG                                                       |
|                              | MdCBF3-P5-mut-R                      | CTCATCACCCAATCTTTTTTAATATAT                                                       |
|                              | MdCAX3L-2-P1-F                       | CTTACTCTACTTCATCTGACAAGATACTATCTAGC                                               |
|                              | MdCAX3L-2-P1-R                       | GCTAGATAGTATCTTGTGTCAGATGAAGTAGAGTAAG                                             |
|                              | MdCAX3L-2-P2-F                       | CTATCAACAATCTCAATTGCAAAGAAAAATG                                                   |
|                              | MdCAX3L-2-P2-R                       | CATTTTTCTTTGCAATTGAGATTGTTGATAG                                                   |
|                              | MdCAX3L-2-P3-F                       | GGTGAGCATTACCACCACTTGGGGGGTGGATTCCGG                                              |
|                              | MdCAX3L-2-P3-R                       | CCGAATCCACCCCTCAAGTGGTGGTAATGCTCACC                                               |
|                              | MdCAX3L-2-P4-F                       | CGTTCAGAACTCAGTTGACTGATTCTATAGATAAGG                                              |
|                              | MdCAX3L-2-P4-R                       | CCTTATCTATAGAATCAGTCAACTGAGTTCTGAACG                                              |
|                              | MdCAX3L-2-P5-F                       | CTAAAACGAGCCATCTGGCCAGCCCTCGG                                                     |
|                              | MdCAX3L-2-P5-R                       | CCGAGGGCTGGCCAGATGGCTCGTTTTAG                                                     |
| MdCAX3L-2-P1-mut-F           | CTTACTCTACTTAAAAAACAAGATACTATCTAGC   |                                                                                   |
| MdCAX3L-2-P1-mut-R           | GCTAGATAGTATCTTGTTTTTTTAAGTAGAGTAAG  |                                                                                   |
| MdCAX3L-2-P3-mut-F           | GGTGAGCATTACCACAAAAAAGGGGGTGGATTCCGG |                                                                                   |
| MdCAX3L-2-P3-mut-R           | CCGAATCCACCCCTTTTTTTGTGGTAATGCTCACC  |                                                                                   |
| <b>Chip-qPCR analysis</b>    | MdCBF1-pro2-qF                       | GCAAGCAAAATACAGATTGT                                                              |
|                              | MdCBF1-pro2-qR                       | TCCTTTTTTCGGAAGTTGCGG                                                             |
|                              | MdCBF3-pro4-qF                       | GAGGCCGACCTTTGACCTTG                                                              |
|                              | MdCBF3-pro4-qR                       | ATTTTATCCCTCCCTCCC                                                                |
| <b>Mutant identification</b> | LBb1.3                               | ATTTTGCCGATTTTCGGAAC                                                              |
|                              | myc70-LP                             | AAACTGCCACAGCCAATAATG                                                             |
|                              | myc70-RP                             | TGGGTTGAATGGAAGTTCTTG                                                             |
| <b>Universal primer</b>      | pCAM-R                               | GACCGGCAACAGGATTCAATC                                                             |
|                              | 2300GFP-R                            | CAGGGTCAGCTTGCCGTAG                                                               |

|  |        |                          |
|--|--------|--------------------------|
|  | pK7-R1 | CCGTAAGAAGAGGCAAGAGTATGA |
|--|--------|--------------------------|

The red letters refer to the nucleotide sequences in the vectors.
